# Supplementary material for: Assessment of Herd, Calf, and Colostrum Management Practices on Austrian Dairy Farms Using a Scoring System
Source: MDPI journal article supplement (doi:10.3390/ani13172758), 2023-08-30

**Table S1:** Original survey (German and translated to English) on herd-, calf- and colostrum management practices on 2,210 Austrian farms. In total 24 single choice questions were included.

## Fragebogen Kälbermanagement – Kolostrummanagement

Daniela Klein-Jöbstl und Nicole Hechenberger

1. In welchem Bundesland befindet sich Ihr Betrieb?

- Burgenland
- Kärnten
- Niederösterreich
- Oberösterreich
- Salzburg
- Steiermark
- Tirol
- Vorarlberg
- Wien

2. Sind Sie Mitglied bei (Mehrfachantwort möglich):

- TGD (Tiergesundheitsdienst)
- LKV
- Sonstige \_\_\_\_\_

3. Tierkategorie

- Mutterkuh
- Milchvieh

4. Wie führen Sie Ihren Betrieb? (Wirtschaftsweise)

- biologisch
- konventionell

5. Betriebsstruktur

- Nebenerwerb
- Haupterwerb

6. Wie viele Milchkühe/ Mutterkühe befinden sich auf Ihrem Betrieb?

\_\_\_\_\_

7. GVE (Großvieheinheit)

\_\_\_\_\_

8. Welche Rasse befindet sich vorwiegend in Ihrem Betrieb?

- Fleckvieh
- Braunvieh

Holstein (HF rot/schwarz)

Pinzgauer

Sonstige \_\_\_\_\_

9. Welche Art der Aufstallung haben Sie bei den laktierenden Kühen?

Laufstall und Auslauf/Weide

Laufstall ohne Auslauf/Weide

Anbindehaltung und Auslauf/Weide

Anbindehaltung ohne Auslauf/Weide

Freilandhaltung/ganzjährig Weide

Sonstiges \_\_\_\_\_

10. Nur für Milchviehbetriebe: Wie hoch ist die durchschnittliche Milchleistung Ihrer Herde (305 Tage Standardlaktation)?

\_\_\_\_\_

11. Haben Sie einen eigenen Abkalbebereich (z.B. Abkalbebox)?

ja

nein

11.a. Wieviel Prozent Ihrer Kühe kalben in diesem Abkalbebereich?

alle (100 %)

fast alle (etwa 90 %)

die meisten (etwa 75 %)

etwa die Hälfte

weniger als die Hälfte (< 50 %)

12. Wie lange bleiben die Kälber nach der Geburt gewöhnlich bei der Mutter?

gar nicht bzw. bis Kalb trocken geleckert wurde (< 20 Minuten)

bis zu 1 Stunde

1 bis 4 Stunden nach der Geburt

länger als 4 Stunden bis zu 1 Tag

> 1 Tag

am Betrieb gibt es eine Ammenkuhhaltung

am Betrieb gibt es eine Mutter-gebundene Aufzucht

13. Wann wird die Kuh nach der Kalbung erstmals gemolken

direkt nach der Kalbung, innerhalb einer Stunde

zwischen 1 und 6 Stunden nach der Kalbung

bei der nächsten Melkzeit (Morgens/Abends, egal, wann Kuh kalbt)

die Kuh wird nicht gemolken, das Kalb bleibt bei der Mutter und saugt

14. Wird das Euter vor der Melkung der Biestmilch gereinigt?

ja

nein

wenn ja wie? \_\_\_\_\_

15. Wie wird Kolostrum ermolken?

Melkmaschine

per Hand

die Kuh wird nicht gemolken, das Kalb bleibt bei der Mutter

16. Wann wird gewöhnlich das erste Mal Biestmilch verabreicht?

innerhalb 1 Stunde nach der Geburt

später als 1 Stunde, innerhalb von 4 Stunden

später als 4 Stunde, innerhalb von 6 Stunden

bei der nächsten Melkzeit (Morgens/Abends, egal, wann Kuh kalbt)

gar nicht, Kalb trinkt am Euter der Mutter

17. Wird das Kalb mit dem Kolostrum der eigenen Mutter getränkt?

ja, immer

ja, meistens

ja, wenn die Mutter gute Kolostrumqualität hat

das Kalb bleibt bei der Mutter, trinkt selbst

nein, nicht immer

18 a. wenn nein, welche Biestmilch bzw. Kolostrumersatz wird verwendet?

\_\_\_\_\_

18. Die Biestmilchmenge innerhalb der ersten 6 Stunden beträgt gewöhnlich:

< 2 Liter

2-4 Liter

> 4- 6 Liter

> 6 Liter

unbekannt, Kalb trinkt bei Kuh

19. Wird die Biestmilchqualität beurteilt?

ja

nein

19.a. Wie beurteilen Sie die Kolostrumqualität?

Kolostrumspindel/Kolostrometer/Biestmilchtester

Refraktometer (optisch oder digital)

Augenschein (Farbe, Fließeigenschaft)

Trichter

Sonstiges \_\_\_\_\_

20. Wenn ein Kalb die Biestmilch nicht freiwillig trinkt, wird....:

das Kalb unmittelbar mit Biestmilch gedrencht.

das Kalb innerhalb von 2 bis 6 Stunden gedrencht, wenn es bis dahin nicht selbstständig getrunken hat.

Am Betrieb wird generell gedrencht, egal ob das Kalb selbstständig trinken würde oder nicht.

Das Kalb wird auf keinen Fall gedrencht, es wird wiederholt Biestmilch angeboten.

Sonstiges: \_\_\_\_\_

21. Wie wird dem Kalb das Kolostrum normalerweise verabreicht?

Eimer

Trinkflasche

Drencher

Kalb bleibt bei der Mutter, trinkt am Euter

22. Haben Sie Biestmilch für Notfälle eingefroren?

ja

nein

---

Survey on colostrum management

Daniela Klein-Jöbstl and Nicole Hechenberger

1. In which province is the farm located?

- a. Burgenland
- b. Carinthia
- c. Lower Austria
- d. Upper Austria
- e. Salzburg
- f. Styria
- g. Tyrol
- h. Vorarlberg
- i. Vienna

2. Are you a member of:

- a. Animal health service
- b. Milk performance recording organisation
- c. Other \_\_\_\_\_

3. Animal category:

- a. Cow/calf operation

- b. Dairy cattle
- 4. What is the production type?
  - a. Organic farming
  - b. Conventional farming
- 5. How is the farm operated?
  - a. Full-time
  - b. Part-time
- 6. How many dairy cows are kept on the farm? (nCow)
  - a. \_\_\_\_\_
- 7. How many livestock units are on the farm?
  - a. \_\_\_\_\_
- 8. What breed is primarily kept on your farm?
  - a. Simmental
  - b. Holstein-Friesian
  - c. Original Brown/Brown Swiss
  - d. Pinzgauer
  - e. Other \_\_\_\_\_
- 9. What is the housing type on your farm for lactating/dry cows?
  - a. Freestall barn with outdoor loafing area/pasture
  - b. Freestall barn without outdoor loafing area/pasture
  - c. Tie stalls with outdoor loafing area/pasture
  - d. Tie stalls without outdoor loafing area/pasture
  - e. Free range/all year round pasture
  - f. Other \_\_\_\_\_
- 10. Only for dairy cattle farms: What is the average milk yield in your herd (305 days standard lactation)?
  - a. \_\_\_\_\_
- 11. Do you have a separate calving area?
  - a. Yes
  - b. No
- 11a. How many % of your cattle calve in the separate calving area?
  - a. all (100 %)
  - b. almost all (90 %)
  - c. the majority (75 %)
  - d. half (50 %)
  - e. less than half (< 50 %)
- 12. How long do you leave the calf with the dam after birth?
  - a. Not at all, until the dam licked the calf dry (< 20 min.)
  - b. Up to 1 hour
  - c. 1 - 4 hours after birth
  - d. More than 4 hours, up to 1 day
  - e. > 1 day
  - f. Nurse cow calf rearing system
  - g. Dam bound calf rearing system
- 13. When is the dam first milked after calving?
  - a. Directly after calving, within 1 hour
  - b. Between 1 and 6 hours after calving
  - c. At the next standard milking time (in the morning/evening, no matter when the cow calves)

- d. The dam is not being milked, the calf stays with the dam
- 14. Do you clean the udder before milking colostrum?
  - a. Yes
  - b. No
  - c. If yes, how? \_\_\_\_\_
- 15. How do you harvest colostrum?
  - a. Milking machine
  - b. By hand
  - c. The dam is not being milked, the calf stays with the dam
- 16. When is the calf usually fed colostrum for the first time?
  - a. Within 1 hour after birth
  - b. Between 1 – 4 hours after birth
  - c. Between 4 – 6 hours after birth
  - d. At the ned standard milking time (in the morning/evening, no matter when the cow calves)
  - e. Not at all, the calf is left to suckle the dam
- 17. Is the calf fed with colostrum from his/her own dam?
  - a. Yes, always
  - b. Yes, mostly
  - c. Yes, if the dam has good colostrum quality
  - d. The calf stays with the dam and nurses
  - e. No, not always
- 17a. If no, which colostrum or colostrum replacer is being used?
  - a. \_\_\_\_\_
- 18. The usual quantity of colostrum within the first 6 hours is:
  - a. < 2 litre
  - b. 2 – 4 litre
  - c. > 4 – 6 litre
  - d. > 6 litre
  - e. Unknown, the calf is left to suckle the dam
- 19. Do you test colostrum quality?
  - a. Yes
  - b. No
- 19a. If yes, how do you test colostrum quality?
  - a. Colostrometer
  - b. Refractometer (optical or digital)
  - c. visually (colour/fluidity)
  - d. ColostroCheck Kritzingen
  - e. Other \_\_\_\_\_
- 20. If the calf does not drink colostrum willingly, what do you do?
  - a. The calf is immediately fed by oesophageal tube
  - b. The calf is fed by oesophageal tube within 2 – 6 hours, if it hasn't drunk colostrum independently by that time

- c. On the farm all calves are fed by oesophageal tube in general, no matter if they would drink willingly or not
- d. In no case is the calf fed by oesophageal tube, colostrum is offered multiple times
- e. Other \_\_\_\_\_

21. How do you usually feed colostrum to the calf?

- a. Bucket
- b. Nipple bottle
- c. Oesophageal tube
- d. The calf stays with the dam and nurses

22. Do you have frozen colostrum storages in case of emergencies?

- a. Yes
- b. No

**Table S2:** Allocation of points for the scoring system. The questionnaire was split in three sections. Section 1 was on general farm characteristics (question number 1 to 11), section 2 was on herd management practices (questions number 12 to 19) and section 3 was on calf management practices (questions number 20 to 27). Blue colour in 'Score' column means answers were not included in the scoring system.

| Nr. | Category | Question                                                                  | Answer possibilities                                | Score | Reference           |
|-----|----------|---------------------------------------------------------------------------|-----------------------------------------------------|-------|---------------------|
| 1   | Overview | In which province is the farm located?                                    | Burgenland                                          |       |                     |
|     |          |                                                                           | Carinthia                                           |       |                     |
|     |          |                                                                           | Lower Austria                                       |       |                     |
|     |          |                                                                           | Upper Austria                                       |       |                     |
|     |          |                                                                           | Salzburg                                            |       |                     |
|     |          |                                                                           | Styria                                              |       |                     |
|     |          |                                                                           | Tyrol                                               |       |                     |
|     |          |                                                                           | Vorarlberg                                          |       |                     |
|     |          |                                                                           | Vienna                                              |       |                     |
| 2   | Overview | Are you a member of the Animal Health Service                             | Yes                                                 |       |                     |
|     |          |                                                                           | No                                                  |       |                     |
| 3   | Overview | Are you a memeber of routine milk recording                               | Yes                                                 |       |                     |
|     |          |                                                                           | No                                                  |       | Excluded from study |
| 4   | Overview | Animal Category                                                           | dairy cattle                                        |       |                     |
| 5   | Overview | What is the operation type?                                               | organic farming                                     |       |                     |
|     |          |                                                                           | conventional farming                                |       |                     |
| 6   | Overview | How is the farm operated?                                                 | Full-time                                           |       |                     |
|     |          |                                                                           | Part-time                                           |       |                     |
| 7   | Overview | How many dairy cows are kept on the farm? (nCow)                          | ≤ 10                                                |       |                     |
|     |          |                                                                           | 11 - 20                                             |       |                     |
|     |          |                                                                           | 21 - 30                                             |       |                     |
|     |          |                                                                           | 31 - 40                                             |       |                     |
|     |          |                                                                           | ≥ 40                                                |       |                     |
| 8   | Overview | How many livestock units are on the farm?                                 | ≤ 20                                                |       |                     |
|     |          |                                                                           | 21 - 50                                             |       |                     |
|     |          |                                                                           | 51 - 100                                            |       |                     |
|     |          |                                                                           | 101 - 150                                           |       |                     |
|     |          |                                                                           | ≥ 150                                               |       |                     |
| 9   | Overview | What breed is primarily kept on the farm?                                 | Simmental                                           |       |                     |
|     |          |                                                                           | Holstein-Fresian                                    |       |                     |
|     |          |                                                                           | Original Brown/Brown Swiss                          |       |                     |
|     |          |                                                                           | Pinzgauer                                           |       |                     |
|     |          |                                                                           | Jersey                                              |       |                     |
|     |          |                                                                           | Tyrol Grey                                          |       |                     |
|     |          |                                                                           | Others (WBB, Tuxer, Angus)                          |       |                     |
|     |          |                                                                           | Crossbreed                                          |       |                     |
| 10  | Overview | What is the housing type on the farm for lactating/dry cows?              | Freestall barn with outdoor loafing area/pasture    |       |                     |
|     |          |                                                                           | Freestall barn without outdoor loafing area/pasture |       |                     |
|     |          |                                                                           | Tie stalls with outdoor loafing area/pasture        |       |                     |
|     |          |                                                                           | Tie stalls without outdoor loafing area/pasture     |       |                     |
| 11  | Overview | What is the average milk yield in your herd (305 days standard lactation) | no or implausible answer                            |       |                     |
|     |          |                                                                           | 2000 - 6500                                         |       |                     |
|     |          |                                                                           | 6501 - 7500                                         |       |                     |
|     |          |                                                                           | 7501 - 8700                                         |       |                     |
|     |          |                                                                           | 8701 - 14.000                                       |       |                     |



| Nr. | Category        | Question                                                      | Answer possibilities                                                             | Score | Reference                                                                                                                                                                                                      |
|-----|-----------------|---------------------------------------------------------------|----------------------------------------------------------------------------------|-------|----------------------------------------------------------------------------------------------------------------------------------------------------------------------------------------------------------------|
| 12  | Herd management | How long do you leave the calf with the dam after birth?      | not at all, until the dam licked the calf dry (< 20 min.)                        |       |                                                                                                                                                                                                                |
|     |                 |                                                               | up to 1 hour                                                                     |       |                                                                                                                                                                                                                |
|     |                 |                                                               | 1 - 4 hours after birth                                                          |       |                                                                                                                                                                                                                |
|     |                 |                                                               | more than 4 hours, up to 1 day                                                   |       |                                                                                                                                                                                                                |
|     |                 |                                                               | > 1 Day                                                                          |       |                                                                                                                                                                                                                |
|     |                 |                                                               | nurse cow calf rearing                                                           |       |                                                                                                                                                                                                                |
|     |                 |                                                               | dam bound calf rearing                                                           |       |                                                                                                                                                                                                                |
| 13  | Herd management | How do you harvest colostrum?                                 | milking machine                                                                  | 3     | S. Stewart et al. 2005. Preventing Bacterial Contamination and Proliferation During the Harvest, Storage, and Feeding of Fresh Bovine Colostrum                                                                |
|     |                 |                                                               | by hand                                                                          | 1     |                                                                                                                                                                                                                |
|     |                 |                                                               | the dam is not being milked, the calf stays with the dam                         | 1     |                                                                                                                                                                                                                |
| 14  | Herd management | Do you have a seperate calving area?                          | Yes                                                                              | 1     | Mee JF (2008) Newborn dairy calf management. Vet Clin North am Food Anim Pract 24:1-17                                                                                                                         |
|     |                 |                                                               | No                                                                               | 0     |                                                                                                                                                                                                                |
| 15  | Herd management | How many % of your cattle calve in the seperate calving area? | all (100%)                                                                       | 4     | Svensson C, Lundborg K, Emanuelson U, Olsson SO (2003) Morbidity in Swedish dairy calves from birth to 90 days of age and individual calf-level risk factors for infectious diseases. Prev Vet Med. 58:179-197 |
|     |                 |                                                               | almost all (90%)                                                                 | 3     |                                                                                                                                                                                                                |
|     |                 |                                                               | the most (75%)                                                                   | 2     |                                                                                                                                                                                                                |
|     |                 |                                                               | Half (50%)                                                                       | 1     |                                                                                                                                                                                                                |
|     |                 |                                                               | less than half <50%                                                              | 0     |                                                                                                                                                                                                                |
| 16  | Herd management | When is the dam first milked after calving?                   | directly after calving, within 1 hour                                            | 4     | A.L. Beam 2009. Prevalence of Failure of passive transfer of immunity in newborn heifer calves and associated management practices on US dairy operations                                                      |
|     |                 |                                                               | between 1 and 6 hours after calving                                              | 3     |                                                                                                                                                                                                                |
|     |                 |                                                               | at the next milking time (in the morning/evening, no matter when the cow calves) | 1     |                                                                                                                                                                                                                |
|     |                 |                                                               | the dam is not being milked, the calf stays with the dam                         | 1     |                                                                                                                                                                                                                |
| 17  | Herd management | Do you have colostrum frozen in case of emergencies?          | Yes                                                                              | 1     | N. M. Holloway et al. 2001. Serum Immunglobulin G concentrations in calves fed fresh and frozen colostrum                                                                                                      |
|     |                 |                                                               | No                                                                               | 0     |                                                                                                                                                                                                                |
| 18  | Herd management | Do you clean the udder before milking colostrum?              | Yes                                                                              | 1     | S. Stewart et al. 2005. Preventing Bacterial Contamination and Proliferation During the Harvest, Storage, and Feeding of Fresh Bovine Colostrum                                                                |
|     |                 |                                                               | No                                                                               | 0     |                                                                                                                                                                                                                |
| 19  | Herd management | If the udder is cleaned, how?                                 | wood wool                                                                        |       |                                                                                                                                                                                                                |
|     |                 |                                                               | Udder cloth wet                                                                  |       |                                                                                                                                                                                                                |
|     |                 |                                                               | Udder cloth dry                                                                  |       |                                                                                                                                                                                                                |
|     |                 |                                                               | automaticly (robotic systems)                                                    |       |                                                                                                                                                                                                                |

| Nr. | Category         | Question                                                      | Answer possibilities                                                                                                 | Score | Reference                                                                                                                                                                                                                                |
|-----|------------------|---------------------------------------------------------------|----------------------------------------------------------------------------------------------------------------------|-------|------------------------------------------------------------------------------------------------------------------------------------------------------------------------------------------------------------------------------------------|
| 20  | Calf mangagement | Is the calf fed with colostrum from his/her own dam           | yes, always                                                                                                          | 2     | Priestley et al 2013. Effect of feeding maternal colostrum or plasma-derived or colostrum derived colostrum replacer on passive transfer of immunity, health, and performance of preweaning heifer calves                                |
|     |                  |                                                               | mostly                                                                                                               | 1     |                                                                                                                                                                                                                                          |
|     |                  |                                                               | yes, if the dam has good colostrum quality                                                                           | 3     |                                                                                                                                                                                                                                          |
|     |                  |                                                               | the calf stays with the dam and nurses                                                                               | 1     |                                                                                                                                                                                                                                          |
|     |                  |                                                               | no, not always                                                                                                       | 2     |                                                                                                                                                                                                                                          |
| 21  | Calf mangagement | If not always, what do you use?                               | frozen colostrum                                                                                                     | 3     | Priestley et al 2013. Effect of feeding maternal colostrum or plasma-derived or colostrum derived colostrum replacer on passive transfer of immunity, health, and performance of preweaning heifer calves                                |
|     |                  |                                                               | colostrum replacer                                                                                                   | 1     |                                                                                                                                                                                                                                          |
| 22  | Calf mangagement | How do you usually feed the calf colostrum?                   | bucket                                                                                                               | 3     | S.M. Godden 2009. Interaction between feeding method and volume colostrum fed                                                                                                                                                            |
|     |                  |                                                               | nipple bottle                                                                                                        | 3     |                                                                                                                                                                                                                                          |
|     |                  |                                                               | esophageal feeder                                                                                                    | 1     |                                                                                                                                                                                                                                          |
|     |                  |                                                               | the calf stays with the dam and nurses                                                                               | 1     |                                                                                                                                                                                                                                          |
| 23  | Calf mangagement | Do you test the colostrum quality?                            | Yes                                                                                                                  | 1     | Kruse V et al. 1970. Yield of colostrum and immunglobulin in cattle at first milking after parturition                                                                                                                                   |
|     |                  |                                                               | No                                                                                                                   | 0     |                                                                                                                                                                                                                                          |
| 24  | Calf mangagement | If yes, how?                                                  | Colostrometer                                                                                                        | 1     | Inadequate method for testing is visual inspection. Other testing methods depend on the correct usage. There were scored the same; M-C Bartens et al. 2016. Assessment of different methods to estimate bovine colostrum quality on farm |
|     |                  |                                                               | Refractometer (optical or digital)                                                                                   | 1     |                                                                                                                                                                                                                                          |
|     |                  |                                                               | Visually                                                                                                             | 0     |                                                                                                                                                                                                                                          |
|     |                  |                                                               | ColostroCheck Kritzing                                                                                               | 1     |                                                                                                                                                                                                                                          |
| 25  | Calf mangagement | When is the calf usually fed colostrum for the first time?    | within 1 hour after birth                                                                                            | 4     | A.L. Beam 2009. Prevalence of Failure of passive transfer of immunity in newborn heifer calves and associated management practices on US dairy operations                                                                                |
|     |                  |                                                               | 1 - 4 hours after birth                                                                                              | 3     |                                                                                                                                                                                                                                          |
|     |                  |                                                               | 4 - 6 hours after birth                                                                                              | 2     |                                                                                                                                                                                                                                          |
|     |                  |                                                               | at the next milking time (in the morning/evening, no matter when the cow calves)                                     | 1     |                                                                                                                                                                                                                                          |
|     |                  |                                                               | not at all, the calf is left to suckle the dam                                                                       | 1     |                                                                                                                                                                                                                                          |
| 26  | Calf mangagement | The usual quantity of colostrum within the first 6 hours is:  | < 2 Litre                                                                                                            | 2     | D.E.Morin 1997. Effects of quality, Quantity and Timing of Colostrum Feeding                                                                                                                                                             |
|     |                  |                                                               | 2 - 4 Litre                                                                                                          | 3     |                                                                                                                                                                                                                                          |
|     |                  |                                                               | > 4 - 6 Litre                                                                                                        | 3     |                                                                                                                                                                                                                                          |
|     |                  |                                                               | > 6 Litre                                                                                                            | 3     |                                                                                                                                                                                                                                          |
|     |                  |                                                               | unknown, the calf is left to suckle the dam                                                                          | 1     |                                                                                                                                                                                                                                          |
| 27  | Calf mangagement | If a calf does not drink colostrum willingly, what do you do? | the calf is immediately fed by esophageal feeder                                                                     |       |                                                                                                                                                                                                                                          |
|     |                  |                                                               | the calf is fed with an esophageal feeder within 2 - 6 hours, if it hasn't drunk colostrum independetly by that time |       |                                                                                                                                                                                                                                          |
|     |                  |                                                               | on the farm all calves are fed in general by esophageal feeder                                                       |       |                                                                                                                                                                                                                                          |
|     |                  |                                                               | colostrum is offered multiple times, in no case the calf is fed by esophageal feeder                                 |       |                                                                                                                                                                                                                                          |
|     |                  |                                                               | colostrum is offered multiple times, later the calf will be fed by esophageal feeder                                 |       |                                                                                                                                                                                                                                          |
|     |                  |                                                               | Others (Call the vet, supplements)                                                                                   |       |                                                                                                                                                                                                                                          |

[illegible]

**Table S4:** Overview of answers from the second survey section on herd-management practices for each federal state. Part 1 includes the calving area, colostrum harvest and storage procedures in each federal state. BGL = Burgenland, CAR = Carinthia, LOAT = Lower Austria, UPAT = Upper Austria, SBG = Salzburg, STY = Styria, T = Tyrol, VBG = Vorarlberg

| Question                                               | Answer category        | N answers per federal state (% within federal state) |                        |                        |                        |                        |                        |                        |                        | Total                    |
|--------------------------------------------------------|------------------------|------------------------------------------------------|------------------------|------------------------|------------------------|------------------------|------------------------|------------------------|------------------------|--------------------------|
|                                                        |                        | BGL                                                  | CAR                    | LOAT                   | UPAT                   | SBG                    | STY                    | T                      | VBG                    |                          |
| Availability of a separate calving area                | Yes                    | 7<br>(87.5)                                          | 99<br>(65.6)           | 285<br>(70.7)          | 326<br>(72.6)          | 147<br>(49.8)          | 223<br>(65.4)          | 135<br>(30.9)          | 48<br>(40.0)           | 1,270<br>(57.6)          |
|                                                        | No                     | 1<br>(12.5)                                          | 52<br>(34.4)           | 118<br>(29.3)          | 123<br>(27.4)          | 148<br>(50.2)          | 118<br>(34.6)          | 302<br>(69.1)          | 72<br>(60.0)           | 934<br>(42.4)            |
|                                                        | <b>Total</b>           | <b>8<br/>(100.0)</b>                                 | <b>151<br/>(100.0)</b> | <b>403<br/>(100.0)</b> | <b>449<br/>(100.0)</b> | <b>295<br/>(100.0)</b> | <b>341<br/>(100.0)</b> | <b>437<br/>(100.0)</b> | <b>120<br/>(100.0)</b> | <b>2,204<br/>(100.0)</b> |
|                                                        |                        |                                                      |                        |                        |                        |                        |                        |                        |                        |                          |
| Cows actually calving in the separate calving are in % | All (100%)             | 3<br>(42.9)                                          | 24<br>(24.2)           | 79<br>(27.7)           | 103<br>(31.6)          | 39<br>(26.4)           | 41<br>(18.4)           | 37<br>(27.2)           | 10<br>(20.8)           | 336<br>(26.4)            |
|                                                        | Almost all (90%)       | 3<br>(42.9)                                          | 45<br>(45.5)           | 113<br>(39.6)          | 147<br>(45.1)          | 59<br>(39.9)           | 113<br>(50.7)          | 53<br>(39.0)           | 19<br>(39.6)           | 552<br>(43.4)            |
|                                                        | The most (75%)         | 1<br>(14.3)                                          | 15<br>(15.2)           | 41<br>(14.4)           | 37<br>(11.3)           | 24<br>(16.2)           | 43<br>(19.3)           | 19<br>(14.0)           | 12<br>(25.0)           | 192<br>(15.1)            |
|                                                        | Half (50%)             | 0<br>(0.0)                                           | 9<br>(9.1)             | 26<br>(9.1)            | 23<br>(7.1)            | 10<br>(6.8)            | 15<br>(6.7)            | 8<br>(5.9)             | 5<br>(10.4)            | 96<br>(7.5)              |
|                                                        | Less than Half (< 50%) | 0<br>(0.0)                                           | 6<br>(6.1)             | 26<br>(9.1)            | 16<br>(4.9)            | 16<br>(10.8)           | 11<br>(4.9)            | 19<br>(14.0)           | 2<br>(4.2)             | 96<br>(7.5)              |
|                                                        | <b>Total</b>           | <b>7<br/>(100.0)</b>                                 | <b>99<br/>(100.0)</b>  | <b>285<br/>(100.0)</b> | <b>326<br/>(100.0)</b> | <b>148<br/>(100.0)</b> | <b>223<br/>(100.0)</b> | <b>136<br/>(100.0)</b> | <b>48<br/>(100.0)</b>  | <b>1,272<br/>(100.0)</b> |
|                                                        |                        |                                                      |                        |                        |                        |                        |                        |                        |                        |                          |
| Colostrum harvesting method                            | Milking machine        | 4<br>(50.0)                                          | 71<br>(47.0)           | 244<br>(60.8)          | 264<br>(58.8)          | 176<br>(59.9)          | 213<br>(62.8)          | 270<br>(61.9)          | 83<br>(69.2)           | 1,325<br>(60.3)          |
|                                                        | By hand                | 2<br>(25.0)                                          | 73<br>(48.3)           | 145<br>(36.2)          | 176<br>(39.2)          | 106<br>(36.1)          | 114<br>(33.6)          | 153<br>(35.1)          | 33<br>(27.5)           | 802<br>(36.5)            |
|                                                        | Calf stays with dam    | 2<br>(25.0)                                          | 7<br>(4.6)             | 12<br>(3.0)            | 9<br>(2.0)             | 12<br>(4.1)            | 12<br>(3.5)            | 13<br>(3.0)            | 4<br>(3.3)             | 71<br>(3.2)              |
|                                                        | <b>Total</b>           | <b>8<br/>(100.0)</b>                                 | <b>151<br/>(100.0)</b> | <b>401<br/>(100.0)</b> | <b>449<br/>(100.0)</b> | <b>294<br/>(100.0)</b> | <b>339<br/>(100.0)</b> | <b>436<br/>(100.0)</b> | <b>120<br/>(100.0)</b> | <b>2,198<br/>(100.0)</b> |
| Availability of frozen colostrum stocks                | Yes                    | 7<br>(87.5)                                          | 134<br>(88.7)          | 370<br>(91.8)          | 398<br>(89.0)          | 228<br>(78.1)          | 278<br>(81.8)          | 318<br>(72.6)          | 83<br>(69.7)           | 1,816<br>(82.6)          |
|                                                        | No                     | 1<br>(12.5)                                          | 17<br>(11.3)           | 33<br>(8.2)            | 49<br>(11.0)           | 64<br>(21.9)           | 62<br>(18.2)           | 120<br>(27.4)          | 36<br>(30.3)           | 382<br>(17.4)            |
|                                                        | <b>Total</b>           | <b>8<br/>(100.0)</b>                                 | <b>151<br/>(100.0)</b> | <b>403<br/>(100.0)</b> | <b>447<br/>(100.0)</b> | <b>292<br/>(100.0)</b> | <b>340<br/>(100.0)</b> | <b>438<br/>(100.0)</b> | <b>119<br/>(100.0)</b> | <b>2,198<br/>(100.0)</b> |

**Table S5:** Overview of answers from the second survey section on herd-management practices for each federal state. Part 2 includes calf/dam separation, first milking post partum and udder cleaning in each federal state. BGL = Burgenland, CAR = Carinthia, LOAT = Lower Austria, UPAT = Upper Austria, SBG = Salzburg, STY = Styria, T = Tyrol, VBG = Vorarlberg

| Question                                | Answer category            | N answers per federal state (% within federal state) |             |             |             |             |             |             |             |               |
|-----------------------------------------|----------------------------|------------------------------------------------------|-------------|-------------|-------------|-------------|-------------|-------------|-------------|---------------|
|                                         |                            | BGL                                                  | CAR         | LOAT        | UPAT        | SBG         | STY         | T           | VBG         | Total         |
| Time of calf/dam separation             | Not at all (< 20min.)      | 2                                                    | 79          | 235         | 273         | 142         | 214         | 254         | 67          | 1,266         |
|                                         |                            | (25.0)                                               | (52.7)      | (58.3)      | (60.8)      | (48.3)      | (62.8)      | (58.3)      | (56.3)      | (57.5)        |
|                                         | Up to 1 hour               | 2                                                    | 24          | 73          | 69          | 60          | 48          | 96          | 19          | 391           |
|                                         |                            | (25.0)                                               | (16.0)      | (18.1)      | (15.4)      | (20.4)      | (14.1)      | (22.0)      | (16.0)      | (17.8)        |
|                                         | 1 – 4 hours                | 2                                                    | 15          | 50          | 53          | 28          | 42          | 43          | 15          | 248           |
|                                         |                            | (25.0)                                               | (10.0)      | (12.4)      | (11.8)      | (9.5)       | (12.3)      | (9.9)       | (12.6)      | (11.3)        |
|                                         | > 4 hours up to 1 Day      | 1                                                    | 16          | 30          | 35          | 35          | 30          | 30          | 11          | 188           |
|                                         |                            | (12.5)                                               | (10.7)      | (7.4)       | (7.8)       | (11.9)      | (8.8)       | (6.9)       | (9.2)       | (8.5)         |
|                                         | > 1 Day                    | 1                                                    | 11          | 7           | 14          | 23          | 5           | 10          | 7           | 78            |
|                                         |                            | (12.5)                                               | (7.3)       | (1.7)       | (3.1)       | (7.8)       | (1.5)       | (2.3)       | (5.9)       | (3.5)         |
| Colostrum harvest after partuition      | Nurse cow calf rearing     | 0 (0)                                                | 1 (0.7)     | 2 (0.5)     | 2 (0.4)     | 1 (0.3)     | 0 (0)       | 0 (0)       | 0 (0)       | 6 (0.3)       |
|                                         | Dam bound calf rearing     | 0 (0)                                                | 4 (2.7)     | 6 (1.5)     | 3 (0.7)     | 5 (1.7)     | 2 (0.6)     | 3 (0.7)     | 0 (0)       | 23 (1.1)      |
|                                         | Total                      | 8 (100.0)                                            | 150 (100.0) | 403 (100.0) | 449 (100.0) | 294 (100.0) | 341 (100.0) | 436 (100.0) | 119 (100.0) | 2,200 (100.0) |
|                                         | Within 1 hour              | 2 (25.0)                                             | 83 (55.7)   | 229 (56.7)  | 261 (58.0)  | 161 (54.8)  | 175 (51.3)  | 244 (56.0)  | 61 (51.7)   | 1,216 (55.3)  |
|                                         |                            | 2 (25.0)                                             | 51 (34.2)   | 130 (32.2)  | 136 (30.2)  | 99 (33.7)   | 107 (31.4)  | 148 (33.9)  | 48 (40.7)   | 721 (32.8)    |
|                                         | Next milking time          | 3 (37.5)                                             | 9 (6.0)     | 39 (9.7)    | 48 (10.7)   | 29 (9.9)    | 54 (15.8)   | 37 (8.5)    | 9 (7.6)     | 228 (10.4)    |
|                                         |                            | 1 (12.5)                                             | 6 (4.0)     | 6 (1.5)     | 5 (1.1)     | 5 (1.7)     | 5 (1.5)     | 7 (1.6)     | 0 (0.0)     | 35 (1.6)      |
|                                         | Calf stays with dam        | 8 (100.0)                                            | 149 (100.0) | 404 (100.0) | 450 (100.0) | 294 (100.0) | 341 (100.0) | 436 (100.0) | 118 (100.0) | 2,200 (100.0) |
|                                         | Total                      | 7 (87.5)                                             | 126 (84.0)  | 351 (86.9)  | 398 (88.4)  | 254 (86.4)  | 313 (91.8)  | 364 (83.9)  | 87 (73.1)   | 1,900 (86.4)  |
|                                         |                            | 1 (12.5)                                             | 24 (16.0)   | 53 (13.1)   | 52 (11.6)   | 40 (13.6)   | 28 (8.2)    | 70 (16.1)   | 32 (26.9)   | 300 (13.6)    |
| Udder cleaning before colostrum milking | Yes                        | 8 (100.0)                                            | 150 (100.0) | 404 (100.0) | 450 (100.0) | 294 (100.0) | 341 (100.0) | 434 (100.0) | 119 (100.0) | 2,200 (100.0) |
|                                         | No                         | 0 (0.0)                                              | 21 (16.7)   | 58 (16.6)   | 105 (26.6)  | 93 (36.8)   | 56 (18.0)   | 43 (11.9)   | 6 (6.9)     | 382 (20.2)    |
|                                         | Udder cloth wet            | 3 (42.9)                                             | 50 (39.7)   | 116 (33.2)  | 100 (25.3)  | 66 (26.1)   | 118 (37.9)  | 124 (34.3)  | 41 (47.1)   | 618 (32.7)    |
|                                         | Udder cloth dry            | 4 (57.1)                                             | 52 (41.3)   | 168 (48.1)  | 181 (45.8)  | 90 (35.6)   | 135 (43.4)  | 189 (52.4)  | 39 (44.8)   | 858 (45.4)    |
|                                         | Automatic (robotic system) | 0 (0.0)                                              | 3 (2.4)     | 7 (2.0)     | 9 (2.3)     | 4 (1.6)     | 2 (0.6)     | 5 (1.4)     | 1 (1.1)     | 31 (1.6)      |
| Udder cleaning methods                  | Total                      | 7 (100.0)                                            | 126 (100.0) | 349 (100.0) | 395 (100.0) | 253 (100.0) | 311 (100.0) | 361 (100.0) | 87 (100.0)  | 1,889 (100.0) |

**Table S6:** Overview of answers given in survey section three on calf management practices for each federal state. Part 1 concerning colostrum source and testing methods of colostrum quality. BGL = Burgenland, CAR = Carinthia, LOAT = Lower Austria, UPAT = Upper Austria, SBG = Salzburg, STY = Styria, T = Tyrol, VBG = Vorarlberg

| Question                            | Answer category                        | N answers per federal state (% within federal state) |                        |                        |                        |                        |                        |                        |                        | Total                    |
|-------------------------------------|----------------------------------------|------------------------------------------------------|------------------------|------------------------|------------------------|------------------------|------------------------|------------------------|------------------------|--------------------------|
|                                     |                                        | BGL                                                  | CAR                    | LOAT                   | UPAT                   | SBG                    | STY                    | T                      | VBG                    |                          |
| Colostrum from mother               | Yes, always                            | 5<br>(62.5)                                          | 98<br>(64.9)           | 244<br>(60.4)          | 263<br>(58.6)          | 213<br>(72.7)          | 227<br>(66.6)          | 312<br>(71.4)          | 98<br>(81.7)           | 1,460<br>(66.3)          |
|                                     | Mostly                                 | 0<br>(0.0)                                           | 3<br>(2.0)             | 3<br>(0.7)             | 4<br>(0.9)             | 3<br>(1.0)             | 0<br>(0.0)             | 2<br>(0.5)             | 0<br>(0.0)             | 15<br>(0.7)              |
|                                     | Yes, if dam has good colostrum quality | 1<br>(12.5)                                          | 39<br>(25.8)           | 133<br>(32.9)          | 163<br>(36.3)          | 61<br>(20.8)           | 97<br>(28.4)           | 105<br>(24.0)          | 18<br>(15.0)           | 617<br>(28.0)            |
|                                     | Calf stays with dam                    | 2<br>(25.0)                                          | 10<br>(6.6)            | 16<br>(4.0)            | 9<br>(2.0)             | 15<br>(5.1)            | 15<br>(4.4)            | 15<br>(3.4)            | 4<br>(3.3)             | 86<br>(3.9)              |
|                                     | No, not always                         | 0<br>(0.0)                                           | 1<br>(0.7)             | 8<br>(2.0)             | 10<br>(2.2)            | 1<br>(0.3)             | 2<br>(0.6)             | 3<br>(0.7)             | 0<br>(0.0)             | 25<br>(1.1)              |
|                                     | <b>Total</b>                           | <b>8<br/>(100.0)</b>                                 | <b>151<br/>(100.0)</b> | <b>404<br/>(100.0)</b> | <b>449<br/>(100.0)</b> | <b>293<br/>(100.0)</b> | <b>338<br/>(100.0)</b> | <b>437<br/>(100.0)</b> | <b>120<br/>(100.0)</b> | <b>2,203<br/>(100.0)</b> |
|                                     |                                        |                                                      |                        |                        |                        |                        |                        |                        |                        |                          |
| Colostrum source if not from mother | Frozen colostrum                       | 0<br>(0.0)                                           | 6<br>(100.0)           | 16<br>(100.0)          | 16<br>(94.1)           | 6<br>(85.7)            | 4<br>(100.0)           | 9<br>(100.0)           | 2<br>(100.0)           | 59<br>(96.7)             |
|                                     | Colostrum replacer                     | 0<br>(0.0)                                           | 0<br>(0.0)             | 0<br>(0.0)             | 1<br>(5.9)             | 1<br>(14.3)            | 0<br>(0.0)             | 0<br>(0.0)             | 0<br>(0.0)             | 2 (3.3)                  |
|                                     | <b>Total</b>                           | <b>0<br/>(0.0)</b>                                   | <b>6<br/>(100.0)</b>   | <b>16<br/>(100.0)</b>  | <b>17<br/>(100.0)</b>  | <b>7<br/>(100.0)</b>   | <b>4<br/>(100.0)</b>   | <b>9<br/>(100.0)</b>   | <b>2<br/>(100.0)</b>   | <b>61<br/>(100.0)</b>    |
| Assessment of colostrum quality     | Yes                                    | 2<br>(25.0)                                          | 50<br>(33.1)           | 91<br>(22.5)           | 139<br>(30.8)          | 78<br>(26.4)           | 86<br>(25.2)           | 112<br>(25.5)          | 32<br>(26.7)           | 590<br>(26.7)            |
|                                     | No                                     | 6<br>(75.0)                                          | 101<br>(66.9)          | 313<br>(77.5)          | 312<br>(69.2)          | 218<br>(73.6)          | 255<br>(74.8)          | 327<br>(74.5)          | 88<br>(73.3)           | 1,620<br>(73.3)          |
|                                     | <b>Total</b>                           | <b>8<br/>(100.0)</b>                                 | <b>151<br/>(100.0)</b> | <b>404<br/>(100.0)</b> | <b>451<br/>(100.0)</b> | <b>296<br/>(100.0)</b> | <b>341<br/>(100.0)</b> | <b>439<br/>(100.0)</b> | <b>120<br/>(100.0)</b> | <b>2,210<br/>(100.0)</b> |
| Colostrum quality assessment method | Colostrometer                          | 0<br>(0.0)                                           | 0<br>(0.0)             | 7<br>(7.9)             | 11<br>(8.1)            | 11<br>(14.5)           | 10<br>(11.9)           | 8<br>(7.2)             | 4<br>(12.9)            | 51<br>(8.8)              |
|                                     | Refractometer                          | 0<br>(0.0)                                           | 4<br>(8.2)             | 18<br>(20.2)           | 33<br>(24.3)           | 19<br>(25.0)           | 20<br>(23.8)           | 12<br>(10.8)           | 0<br>(0.0)             | 106<br>(18.3)            |
|                                     | Visually                               | 2<br>(100.0)                                         | 45<br>(91.8)           | 63<br>(70.8)           | 60<br>(44.1)           | 40<br>(52.6)           | 53<br>(63.1)           | 78<br>(70.3)           | 27<br>(87.1)           | 368<br>(63.7)            |
|                                     | ColostroCheck                          | 0<br>(0.0)                                           | 0<br>(0.0)             | 1<br>(1.1)             | 32<br>(23.5)           | 6<br>(7.9)             | 1<br>(1.2)             | 13<br>(11.7)           | 0<br>(0.0)             | 53<br>(9.2)              |
|                                     | <b>Total</b>                           | <b>2<br/>(100.0)</b>                                 | <b>49<br/>(100.0)</b>  | <b>89<br/>(100.0)</b>  | <b>136<br/>(100.0)</b> | <b>76<br/>(100.0)</b>  | <b>84<br/>(100.0)</b>  | <b>111<br/>(100.0)</b> | <b>31<br/>(100.0)</b>  | <b>578<br/>(100.0)</b>   |

**Table S7:** Overview of answers given in survey section three on calf management practices for each federal state. Part 2 concerning feeding time, quantity of colostrum and feeding methods. BGL = Burgenland, CAR = Carinthia, LOAT = Lower Austria, UPAT = Upper Austria, SBG = Salzburg, STY = Styria, T = Tyrol, VBG = Vorarlberg, p.n. = post natum

| Question                                                   | Answer category                                               | N answers per federal state (% within federal state) |                        |                        |                        |                        |                        |                        |                        |                          |
|------------------------------------------------------------|---------------------------------------------------------------|------------------------------------------------------|------------------------|------------------------|------------------------|------------------------|------------------------|------------------------|------------------------|--------------------------|
|                                                            |                                                               | BGL                                                  | CAR                    | LOAT                   | UPAT                   | SBG                    | STY                    | T                      | VBG                    | Total                    |
| Time from parturition to colostrum feeding                 | Within 1 hour p.n.                                            | 3<br>(37.5)                                          | 91<br>(60.7)           | 240<br>(60.0)          | 271<br>(60.2)          | 190<br>(64.8)          | 178<br>(52.4)          | 259<br>(59.7)          | 60<br>(50.0)           | 1,292<br>(58.9)          |
|                                                            | 1 – 4 hours p.n.                                              | 3<br>(37.5)                                          | 44<br>(29.3)           | 126<br>(31.5)          | 134<br>(29.8)          | 72<br>(24.6)           | 103<br>(30.3)          | 133<br>(30.6)          | 47<br>(39.2)           | 662<br>(30.2)            |
|                                                            | 4 – 6 hours p.n.                                              | 0<br>(0.0)                                           | 2<br>(1.3)             | 4<br>(1.0)             | 6<br>(1.3)             | 7<br>(2.4)             | 13<br>(3.8)            | 11<br>(2.5)            | 7<br>(5.8)             | 50<br>(2.3)              |
|                                                            | Next standard milking time                                    | 0<br>(0.0)                                           | 4<br>(2.7)             | 12<br>(3.0)            | 32<br>(7.1)            | 13<br>(4.4)            | 33<br>(9.7)            | 22<br>(5.1)            | 4<br>(3.3)             | 120<br>(5.5)             |
|                                                            | Calf suckles the dam                                          | 2<br>(25.0)                                          | 9<br>(6.0)             | 18<br>(4.5)            | 7<br>(1.6)             | 11<br>(3.8)            | 13<br>(3.8)            | 9 (2.1)                | 2<br>(1.7)             | 71<br>(3.2)              |
|                                                            | <b>Total</b>                                                  | <b>8<br/>(100.0)</b>                                 | <b>150<br/>(100.0)</b> | <b>400<br/>(100.0)</b> | <b>450<br/>(100.0)</b> | <b>293<br/>(100.0)</b> | <b>340<br/>(100.0)</b> | <b>434<br/>(100.0)</b> | <b>120<br/>(100.0)</b> | <b>2,195<br/>(100.0)</b> |
| Quantity of colostrum fed within first 6 hours after birth | < 2 litres                                                    | 2<br>(25.0)                                          | 34<br>(22.5)           | 78<br>(19.3)           | 87<br>(19.3)           | 27<br>(9.2)            | 63<br>(18.5)           | 93<br>(21.3)           | 28<br>(23.3)           | 412<br>(18.7)            |
|                                                            | 2 – 4 litres                                                  | 3<br>(37.3)                                          | 99<br>(65.6)           | 292<br>(72.3)          | 330<br>(73.3)          | 217<br>(73.8)          | 243<br>(71.3)          | 287<br>(65.8)          | 77<br>(64.2)           | 1,548<br>(70.2)          |
|                                                            | > 4 – 6 litres                                                | 2<br>(25.0)                                          | 10<br>(6.6)            | 17<br>(4.2)            | 24<br>(5.3)            | 38<br>(12.9)           | 23<br>(6.7)            | 41<br>(9.4)            | 12<br>(10.0)           | 167<br>(7.6)             |
|                                                            | > 6 litres                                                    | 0<br>(0.0)                                           | 1<br>(0.7)             | 0<br>(0.0)             | 1<br>(0.2)             | 3<br>(1.0)             | 4<br>(1.2)             | 5<br>(1.1)             | 2<br>(1.7)             | 16<br>(0.7)              |
|                                                            | Unknown, calf with dam                                        | 1<br>(12.5)                                          | 7<br>(4.6)             | 17<br>(4.2)            | 8<br>(1.8)             | 9<br>(3.1)             | 8<br>(2.3)             | 10<br>(2.3)            | 1<br>(0.8)             | 61<br>(2.8)              |
|                                                            | <b>Total</b>                                                  | <b>8<br/>(100.0)</b>                                 | <b>151<br/>(100.0)</b> | <b>404<br/>(100.0)</b> | <b>450<br/>(100.0)</b> | <b>294<br/>(100.0)</b> | <b>341<br/>(100.0)</b> | <b>436<br/>(100.0)</b> | <b>120<br/>(100.0)</b> | <b>2,204<br/>(100.0)</b> |
| Colostrum feeding equipment                                | Bucket                                                        | 3<br>(37.5)                                          | 42<br>(27.8)           | 122<br>(30.4)          | 140<br>(31.2)          | 179<br>(61.3)          | 101<br>(29.8)          | 239<br>(54.6)          | 64<br>(53.8)           | 890<br>(40.5)            |
|                                                            | Nipple bottle                                                 | 4<br>(50.0)                                          | 98<br>(64.9)           | 260<br>(64.8)          | 301<br>(67.0)          | 92<br>(31.5)           | 223<br>(65.8)          | 173<br>(39.5)          | 49<br>(41.2)           | 1,200<br>(54.6)          |
|                                                            | Oesophageal tube                                              | 0<br>(0.0)                                           | 0<br>(0.0)             | 0<br>(0.0)             | 0<br>(0.0)             | 3<br>(1.0)             | 1<br>(0.3)             | 8<br>(1.8)             | 3<br>(2.5)             | 15<br>(0.7)              |
|                                                            | Calf stays with dam                                           | 1<br>(12.5)                                          | 11<br>(7.3)            | 19<br>(4.7)            | 8<br>(1.8)             | 18<br>(6.2)            | 14<br>(4.1)            | 18<br>(4.1)            | 3<br>(2.5)             | 92<br>(4.2)              |
|                                                            | <b>Total</b>                                                  | <b>8<br/>(100.0)</b>                                 | <b>151<br/>(100.0)</b> | <b>401<br/>(100.0)</b> | <b>449<br/>(100.0)</b> | <b>282<br/>(100.0)</b> | <b>339<br/>(100.0)</b> | <b>438<br/>(100.0)</b> | <b>119<br/>(100.0)</b> | <b>2,197<br/>(100.0)</b> |
| Calves not drinking well, receive colostrum                | Immediately oesophageal tube                                  | 1<br>(14.3)                                          | 16<br>(10.7)           | 36<br>(9.0)            | 73<br>(16.3)           | 22<br>(7.6)            | 43<br>(12.6)           | 38<br>(8.8)            | 4<br>(3.4)             | 233<br>(10.6)            |
|                                                            | Oesophageal tube within 2–6 hours                             | 2<br>(28.6)                                          | 34<br>(22.7)           | 92<br>(22.9)           | 118<br>(26.3)          | 61<br>(21.0)           | 65<br>(19.1)           | 69<br>(15.9)           | 22<br>(18.5)           | 463<br>(21.1)            |
|                                                            | By oesophageal tube in general                                | 0<br>(0.0)                                           | 3<br>(2.0)             | 0<br>(0.0)             | 0<br>(0.0)             | 5<br>(1.7)             | 2<br>(0.6)             | 10<br>(2.3)            | 0<br>(0.0)             | 20<br>(0.9)              |
|                                                            | Colostrum offered multiple times, in no case oesophageal tube | 3<br>(42.9)                                          | 94<br>(62.7)           | 266<br>(66.2)          | 254<br>(56.6)          | 199<br>(68.4)          | 219<br>(64.4)          | 308<br>(71.0)          | 93<br>(78.2)           | 1,436<br>(65.5)          |
|                                                            | Colostrum offered multiple times, later oesophageal tube      | 1<br>(14.3)                                          | 3<br>(2.0)             | 8<br>(2.0)             | 2<br>(0.4)             | 4<br>(1.4)             | 11<br>(3.2)            | 8<br>(1.8)             | 0<br>(0.0)             | 37<br>(1.7)              |
|                                                            | Others (vet, supplements, etc.)                               | 0 (0.0)                                              | 0 (0.0)                | 0 (0.0)                | 2 (0.4)                | 0 (0.0)                | 0 (0.0)                | 1 (0.2)                | 0 (0.0)                | 3 (0.1)                  |
|                                                            | <b>Total</b>                                                  | <b>7<br/>(100.0)</b>                                 | <b>150<br/>(100.0)</b> | <b>402<br/>(100.0)</b> | <b>449<br/>(100.0)</b> | <b>291<br/>(100.0)</b> | <b>340<br/>(100.0)</b> | <b>434<br/>(100.0)</b> | <b>119<br/>(100.0)</b> | <b>2,192<br/>(100.0)</b> |

**Figure S1:** Overview on the differences between herd management scores (left figure) and calf management scores (right figure). Each node shows the sample average rank of the federal state. The abbreviations describe the following federal states of Austria: BGL = Burgenland, CAR = Carinthia, LOAT = Lower Austria, UPAT = Upper Austria, SBG = Salzburg, STY = Styria, T = Tyrol, VBG = Vorarlberg. The level of significance was set at  $p < 0.05$ . All statistically significant values are shown with a red coloured line ( $p < 0.05$ ); all not statistically significant differences are shown in green colour ( $p \geq 0.05$ ).

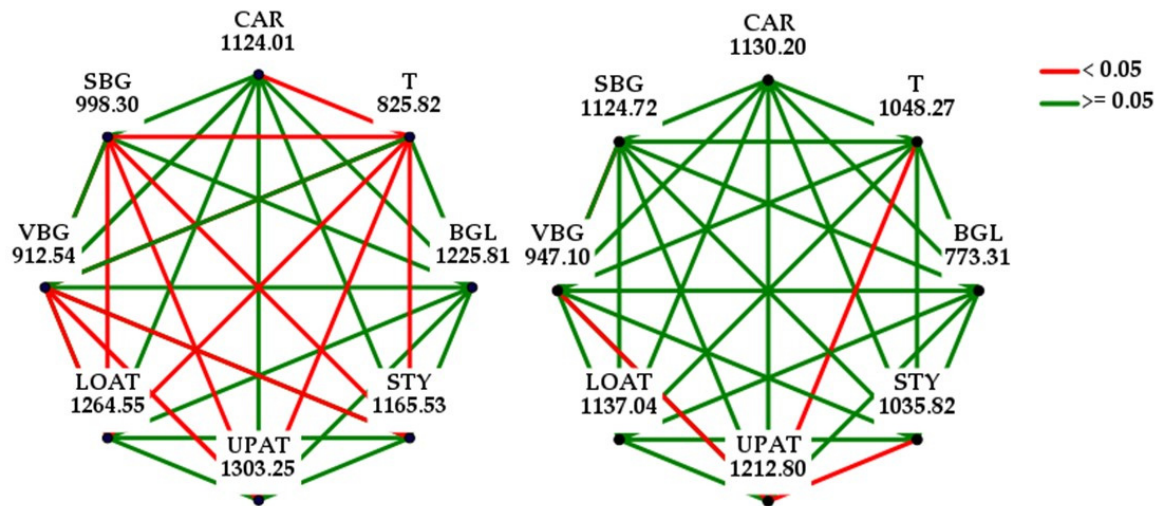

Supplement: s1 [file s1]
